# Supplementary material
Source: publisher site journal article supplement (https://study.sagepub.com/sites/default/files/16%20Bloomberg%203e%20Appendix%20Y.pdf)
Supplement: Supplementary file 1 [file 16%20Bloomberg%203e%20Appendix%20Y.pdf]

## Appendix Y. Data Summary Table: Finding 5

| Process | Name    | Impediments |                                  |                               |                                  |                          |                                     |                  |
|---------|---------|-------------|----------------------------------|-------------------------------|----------------------------------|--------------------------|-------------------------------------|------------------|
|         |         | Advisor     | Professional/<br>Work<br>Demands | Personal/<br>Family<br>Issues | Other Faculty/<br>Administration | Financial<br>Constraints | Lack of<br>Confidence<br>in Ability | Rigid<br>Outlook |
| 1       | Mollie  |             |                                  | X                             |                                  | X                        | X                                   |                  |
| 2       | Hank    | X           | X                                |                               | X CI                             |                          |                                     |                  |
| 3       | Morris  |             |                                  |                               |                                  |                          |                                     | X CI             |
| 4       | Debbie  | X           |                                  | X                             |                                  |                          |                                     |                  |
| 5       | Doris   | X           | X                                |                               |                                  | X                        | X                                   | X                |
| 6       | Anthony | X           | X                                |                               |                                  |                          |                                     |                  |
| 7       | Anne    | X           |                                  |                               | X                                |                          | X                                   |                  |
| 8       | Brent   | X           |                                  |                               |                                  |                          |                                     |                  |
| 9       | Angela  |             | X                                | X                             | X                                |                          |                                     |                  |
| 10      | Jane    |             | X                                |                               | X                                |                          |                                     |                  |
| 11      | Brad    | X           |                                  | X                             |                                  | X                        |                                     |                  |
| 12      | Dexter  | X           | X                                |                               |                                  |                          |                                     |                  |
| 13      | Frankie | X           | X                                |                               |                                  |                          |                                     |                  |
| 14      | Sally   |             | X                                |                               |                                  | X                        |                                     | X                |
| 15      | Shana   | X           |                                  |                               |                                  |                          | X                                   |                  |
| 16      | Lin     | X           | X                                |                               |                                  |                          |                                     |                  |
| 17      | Carin   | X           |                                  | X                             |                                  | X                        |                                     |                  |
| 18      | Fay     |             |                                  |                               | X                                |                          | X                                   |                  |
| 19      | Connie  | X           | X                                |                               |                                  |                          |                                     |                  |
| 20      | Julia   | X           |                                  | X                             | X                                |                          |                                     |                  |
| TOTAL   |         | 14 (70%)    | 10 (50%)                         | 6 (30%)                       | 6 (30%)                          | 5 (25%)                  | 5 (25%)                             | 3 (15%)          |

\*CI denotes data obtained from critical incident.
